# Supplementary material for: Evolution from gravimetric to viscoelastic response of poly(3-methylthiophene)-loaded acoustic wave resonators
Source: Royal Society of Chemistry journal article supplement (doi:10.1039/b004807k), 2000-01-01
Supplement: figures.doc [file figures.doc]

**EVOLUTION FROM GRAVIMETRIC TO VISCOELASTIC RESPONSE OF**

**POLY(3-METHYLTHIOPHENE)-LOADED ACOUSTIC WAVE RESONATORS**

Magdalena Skompskaa, Angela Jacksonb and A. Robert Hillmanb*

a Department of Chemistry, Warsaw University, ul.Pasteur1, 02 093 Warsaw, Poland

b Department of Chemistry, Leicester University, Leicester LE1 7RH, U.K.

**SUPPLEMENTARY MATERIAL**

Current–time transients (see Fig. S1) obtained during potentiostatic polymerization of 3- methylthiophene, at E = 1.26 V, are similar to those presented in the literature for thiophene and several of its 3-alkyl substituted derivatives. The dependence of the resonant frequency on the charge passed during polymerization, presented in Fig. S1b, consists of two linear segments of different slopes. The first segment (denoted A) extends from 1 mC cm-2 to 14 mC cm-2, and the second part (denoted B) corresponds to polymer deposition charge densities Qdep > 15 mC cm-2. The slope of the second linear segment of the *f*-Q graph is 0.60Å0.02 mg C-1.

Conductance signals, obtained before and after deposition of the films on Au at different charge densities (Qdep = 12 mC cm-2, 32 mC cm-2, and 49 mC cm-2), are presented in Fig. S2. The spectra obtained indicate that the viscoelastic properties of poly(3-methylthiophene) films depend strongly on the charge involved in their polymerization, and that even films formed at quite moderate charge density, Qdep 32 mC cm-2, were not totally rigid.

**
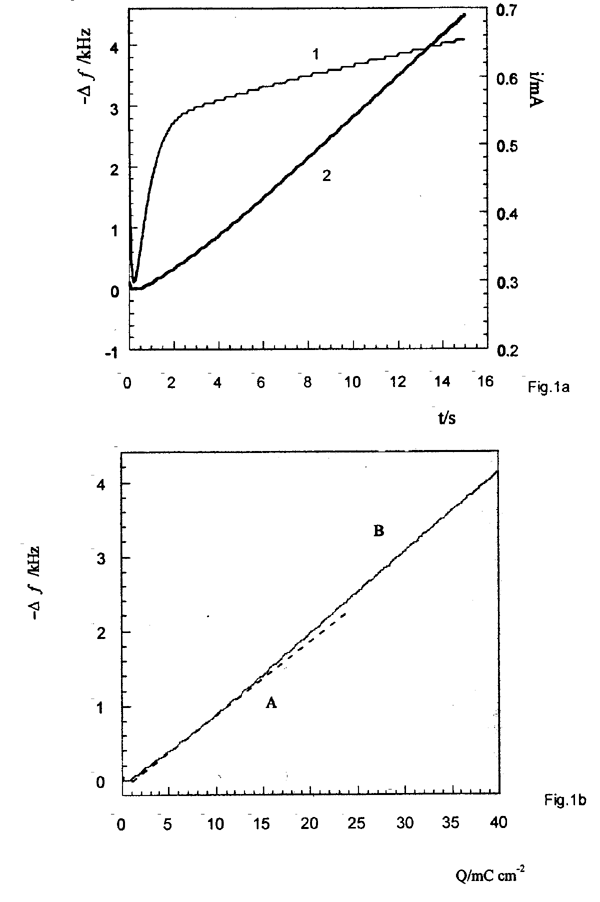
**

Figure S1. (a) Current (trace 1) and resonant frequency change (trace 2) responses during the electrodeposition of poly(3-methylthiophene). At t = 0, the potential was stepped from 0 to 1.26 V. Solution and other conditions described in Experimental section. (b) Plot of resonant frequency change against deposition charge for the data from (a).


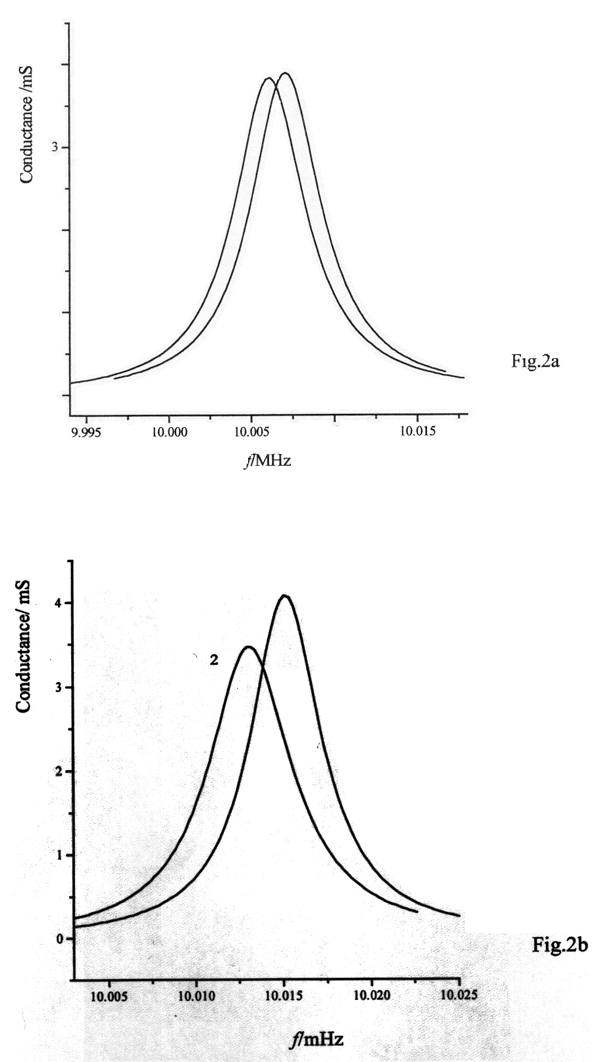


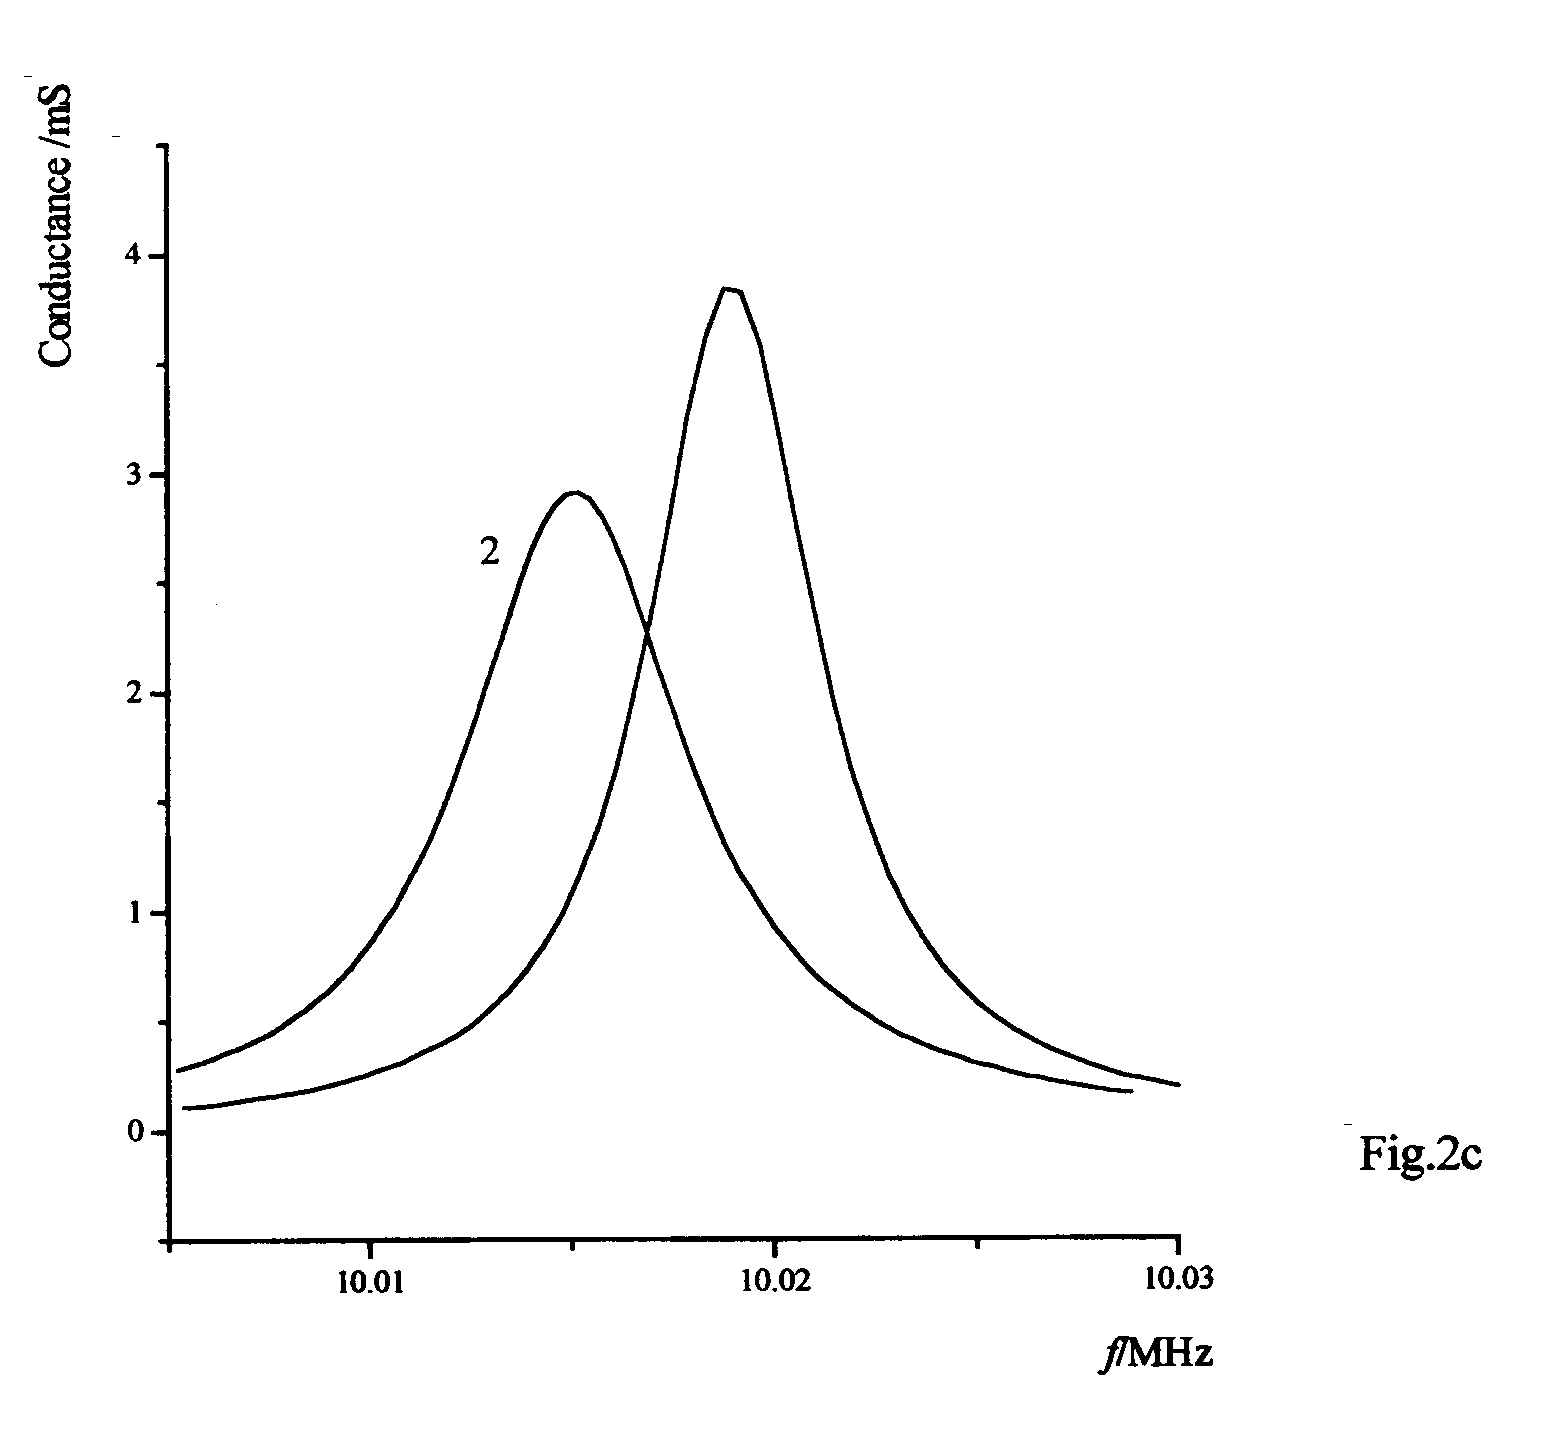


Figure S2. Crystal impedance spectra for Au electrodes immersed in deposition solution before (traces 1) and after (traces 2) deposition of poly(3-methylthiophene) films by passage of charges of (a) 12 mC cm–2, (b) 32 mC cm–2, ( c) 49 mC cm–2. For traces 2, films were maintained in fully reduced state at -0.4 V.
